# Supplementary material
Source: publisher figshare collection journal article supplement (https://frontiersin.figshare.com/ndownloader/files/25396757)
Supplement: Supplementary file [file 25396757]

Supplemental Table 1: Differentially regulated genes between grades 1 and 3.

| Gene Symbol | Gene name                                       | $\log_2(\text{fold})$ | $-\log_{10}(p)$ |
|-------------|-------------------------------------------------|-----------------------|-----------------|
| DTL         | Denticleless protein homolog                    | +1.09                 | 6.60            |
| SLC7A1      | High affinity cationic amino acid transporter 1 | +1.04                 | 8.25            |
| CENPF       | Centromere protein F precursor                  | +1.03                 | 6.55            |
| TPX2        | Targeting protein for Xklp2                     | +1.02                 | 8.87            |
| LEPR        | Leptin receptor                                 | -1.05                 | 5.15            |
| EGFL6       | Epidermal growth factor like domain multiple 6  | -1.03                 | 6.05            |
